# Supplementary material
Source: PubMed Central journal article supplement (PMC6628724)
Supplement: NIHMS1034273-supplement-1.pdf [file NIHMS1034273-supplement-1.pdf]

Supplementary Table 1. Age-adjusted (2000 U.S. standard population) incidence of colorectal cancer by Hispanic ethnicity, age (+/- 50 years), and anatomic subsite, National Program of Cancer Registries, 2001-2014

|      | Non-Hispanic white (n=1,466,205 cases) |        |        |               |        |        | Hispanic (n=118,094 cases) |        |        |               |        |        |
|------|----------------------------------------|--------|--------|---------------|--------|--------|----------------------------|--------|--------|---------------|--------|--------|
|      | Age 20-49 years                        |        |        | Age ≥50 years |        |        | Age 20-49 years            |        |        | Age ≥50 years |        |        |
|      | Proximal                               | Distal | Rectal | Proximal      | Distal | Rectal | Proximal                   | Distal | Rectal | Proximal      | Distal | Rectal |
| 2001 | 2.7                                    | 2.7    | 3.8    | 78.2          | 44.6   | 47.4   | 2.2                        | 2.2    | 3.4    | 59.4          | 39.1   | 43.1   |
| 2002 | 2.8                                    | 2.6    | 4.0    | 75.8          | 43.0   | 45.7   | 2.4                        | 2.1    | 3.2    | 57.0          | 37.9   | 42.0   |
| 2003 | 2.8                                    | 2.7    | 3.9    | 74.7          | 40.8   | 44.7   | 2.3                        | 2.6    | 3.4    | 57.8          | 36.6   | 41.0   |
| 2004 | 2.7                                    | 2.7    | 4.2    | 72.6          | 39.3   | 43.2   | 2.5                        | 2.3    | 3.5    | 58.2          | 36.5   | 40.8   |
| 2005 | 2.8                                    | 2.8    | 4.1    | 70.3          | 37.2   | 42.3   | 2.4                        | 2.4    | 3.2    | 56.1          | 35.2   | 40.6   |
| 2006 | 2.8                                    | 2.9    | 4.3    | 68.4          | 35.4   | 40.0   | 2.6                        | 2.4    | 3.3    | 56.5          | 34.3   | 39.1   |
| 2007 | 2.8                                    | 2.8    | 4.6    | 66.9          | 34.2   | 38.8   | 2.3                        | 2.7    | 3.3    | 53.9          | 33.2   | 38.0   |
| 2008 | 2.9                                    | 3.0    | 4.5    | 65.0          | 32.3   | 37.3   | 2.3                        | 2.3    | 3.7    | 51.1          | 32.9   | 38.2   |
| 2009 | 2.8                                    | 3.0    | 4.8    | 61.1          | 29.6   | 35.9   | 2.4                        | 2.6    | 3.3    | 51.7          | 30.8   | 36.0   |
| 2010 | 2.8                                    | 3.1    | 4.6    | 58.2          | 27.4   | 34.2   | 2.3                        | 2.5    | 3.5    | 47.7          | 27.9   | 34.7   |
| 2011 | 2.8                                    | 3.1    | 4.7    | 56.5          | 26.9   | 33.4   | 2.2                        | 2.4    | 3.5    | 47.7          | 28.0   | 33.9   |
| 2012 | 2.9                                    | 3.2    | 4.9    | 54.3          | 25.3   | 32.8   | 2.1                        | 2.3    | 3.5    | 44.2          | 25.3   | 31.9   |
| 2013 | 2.8                                    | 3.2    | 4.9    | 53.3          | 24.7   | 32.0   | 2.2                        | 2.6    | 3.4    | 44.7          | 25.7   | 31.1   |
| 2014 | 2.9                                    | 3.4    | 5.1    | 50.9          | 24.2   | 32.0   | 2.1                        | 2.5    | 3.5    | 42.5          | 24.1   | 31.5   |

NOTE: 99,322 and 8,634 cases missing anatomic subsite among whites and Hispanics, respectively, not included in incidence calculations.

Supplementary Table 2. Age-adjusted (2000 U.S. standard population) incidence of colorectal cancer by Hispanic ethnicity, age (+/- 50 years), and stage at diagnosis, National Program of Cancer Registries, 2001-2014

|      | Non-Hispanic whites (n=1,466,274 cases) |          |         |               |          |         | Hispanics (n=117,598) |          |         |               |          |         |
|------|-----------------------------------------|----------|---------|---------------|----------|---------|-----------------------|----------|---------|---------------|----------|---------|
|      | Age 20-49 years                         |          |         | Age ≥50 years |          |         | Age 20-49 years       |          |         | Age ≥50 years |          |         |
|      | Local                                   | Regional | Distant | Local         | Regional | Distant | Local                 | Regional | Distant | Local         | Regional | Distant |
| 2001 | 3.1                                     | 4.1      | 2.2     | 67.3          | 70.2     | 28.7    | 2.4                   | 3.6      | 1.9     | 50.1          | 60.4     | 26.0    |
| 2002 | 3.3                                     | 4.2      | 2.2     | 66.2          | 67.6     | 27.9    | 2.7                   | 3.1      | 2.0     | 49.8          | 57.1     | 25.9    |
| 2003 | 3.2                                     | 4.2      | 2.4     | 64.4          | 65.6     | 28.2    | 2.6                   | 3.9      | 2.1     | 50.2          | 55.4     | 25.8    |
| 2004 | 3.6                                     | 4.0      | 2.5     | 69.3          | 56.8     | 28.3    | 2.8                   | 3.6      | 2.1     | 55.4          | 52.6     | 25.8    |
| 2005 | 3.7                                     | 3.9      | 2.6     | 68.1          | 54.1     | 27.4    | 2.6                   | 3.4      | 2.1     | 54.2          | 50.2     | 25.9    |
| 2006 | 3.7                                     | 4.3      | 2.6     | 64.9          | 51.9     | 26.9    | 2.8                   | 3.4      | 2.3     | 53.0          | 48.8     | 27.3    |
| 2007 | 3.8                                     | 4.2      | 2.8     | 63.4          | 50.8     | 26.1    | 2.8                   | 3.7      | 2.2     | 52.5          | 47.2     | 24.6    |
| 2008 | 3.8                                     | 4.3      | 3.0     | 60.9          | 48.6     | 25.8    | 2.8                   | 3.5      | 2.3     | 51.7          | 45.7     | 24.7    |
| 2009 | 3.9                                     | 4.3      | 2.9     | 56.7          | 45.9     | 24.9    | 2.9                   | 3.3      | 2.4     | 50.4          | 43.7     | 23.6    |
| 2010 | 3.8                                     | 4.5      | 3.0     | 52.2          | 44.2     | 24.7    | 3.0                   | 3.3      | 2.4     | 45.7          | 40.8     | 23.0    |
| 2011 | 3.7                                     | 4.5      | 3.1     | 50.2          | 43.6     | 24.4    | 2.6                   | 3.7      | 2.3     | 43.8          | 41.5     | 24.3    |
| 2012 | 3.9                                     | 4.8      | 3.2     | 48.4          | 41.9     | 23.7    | 2.7                   | 3.3      | 2.4     | 41.6          | 38.3     | 22.4    |
| 2013 | 3.8                                     | 4.7      | 3.4     | 46.9          | 41.0     | 24.2    | 2.7                   | 3.5      | 2.6     | 40.7          | 38.2     | 22.6    |
| 2014 | 4.2                                     | 5.0      | 3.4     | 45.6          | 40.4     | 23.4    | 2.6                   | 3.4      | 2.5     | 39.6          | 37.4     | 22.2    |

NOTE: 99,253 and 9,130 cases missing stage at diagnosis among whites and Hispanics, respectively, not included in incidence calculations.

Supplementary Table 3. Age-adjusted (2000 U.S. standard population) incidence of colorectal cancer among non-Hispanic whites by sex, age (+/- 50 years), and anatomic subsite, National Program of Cancer Registries, 2001-2014

|      | Men             |        |        |               |        |        | Women           |        |        |               |        |        |
|------|-----------------|--------|--------|---------------|--------|--------|-----------------|--------|--------|---------------|--------|--------|
|      | Age 20-49 years |        |        | Age ≥50 years |        |        | Age 20-49 years |        |        | Age ≥50 years |        |        |
|      | Proximal        | Distal | Rectal | Proximal      | Distal | Rectal | Proximal        | Distal | Rectal | Proximal      | Distal | Rectal |
| 2001 | 3.0             | 2.6    | 4.1    | 85.1          | 56.8   | 62.4   | 2.4             | 2.7    | 3.4    | 73.2          | 35.3   | 35.6   |
| 2002 | 2.9             | 2.5    | 4.4    | 82.6          | 54.6   | 60.0   | 2.6             | 2.7    | 3.6    | 70.8          | 34.1   | 34.4   |
| 2003 | 3.1             | 2.6    | 4.3    | 81.5          | 51.4   | 58.7   | 2.5             | 2.7    | 3.5    | 69.7          | 32.5   | 33.6   |
| 2004 | 3.0             | 2.7    | 4.6    | 78.8          | 49.9   | 56.3   | 2.5             | 2.8    | 3.8    | 67.9          | 31.1   | 32.7   |
| 2005 | 3.1             | 2.8    | 4.5    | 75.6          | 46.6   | 55.2   | 2.6             | 2.7    | 3.7    | 66.2          | 29.9   | 32.0   |
| 2006 | 3.0             | 2.9    | 4.8    | 72.5          | 44.1   | 51.7   | 2.6             | 2.8    | 3.9    | 65.2          | 28.3   | 30.4   |
| 2007 | 3.2             | 2.7    | 5.1    | 71.5          | 42.6   | 50.2   | 2.5             | 2.9    | 4.2    | 63.3          | 27.3   | 29.3   |
| 2008 | 3.2             | 3.1    | 5.1    | 68.6          | 40.0   | 48.2   | 2.6             | 3.0    | 4.0    | 62.0          | 26.2   | 28.3   |
| 2009 | 3.1             | 3.0    | 5.3    | 64.0          | 36.6   | 46.8   | 2.5             | 2.9    | 4.4    | 58.7          | 23.9   | 26.9   |
| 2010 | 3.0             | 3.2    | 5.1    | 61.5          | 33.6   | 44.1   | 2.5             | 3.1    | 4.1    | 55.5          | 22.2   | 25.9   |
| 2011 | 3.0             | 3.1    | 5.3    | 59.5          | 33.3   | 43.1   | 2.6             | 3.1    | 4.0    | 53.9          | 21.7   | 25.3   |
| 2012 | 3.2             | 3.3    | 5.5    | 56.3          | 31.5   | 42.6   | 2.5             | 3.1    | 4.2    | 52.5          | 20.2   | 24.6   |
| 2013 | 3.1             | 3.3    | 5.4    | 55.8          | 30.7   | 41.1   | 2.6             | 3.1    | 4.3    | 51.1          | 19.6   | 24.3   |
| 2014 | 3.2             | 3.5    | 5.6    | 53.3          | 30.3   | 41.3   | 2.7             | 3.3    | 4.7    | 48.9          | 19.0   | 24.1   |

NOTE: 99,322 cases missing anatomic subsite not included in incidence calculations.

Supplementary Table 4. Age-adjusted (2000 U.S. standard population) incidence of colorectal cancer among Hispanics by sex, age (+/- 50 years), and anatomic subsite, National Program of Cancer Registries, 2001-2014

|      | Men             |        |        |               |        |        | Women           |        |        |               |        |        |
|------|-----------------|--------|--------|---------------|--------|--------|-----------------|--------|--------|---------------|--------|--------|
|      | Age 20-49 years |        |        | Age ≥50 years |        |        | Age 20-49 years |        |        | Age ≥50 years |        |        |
|      | Proximal        | Distal | Rectal | Proximal      | Distal | Rectal | Proximal        | Distal | Rectal | Proximal      | Distal | Rectal |
| 2001 | 2.3             | 1.7    | 3.6    | 67.0          | 51.5   | 58.0   | 2.1             | 2.8    | 3.1    | 53.7          | 30.1   | 31.9   |
| 2002 | 2.4             | 2.0    | 3.6    | 62.4          | 47.5   | 57.1   | 2.3             | 2.1    | 2.7    | 52.7          | 30.6   | 30.6   |
| 2003 | 2.4             | 2.5    | 3.8    | 63.6          | 47.7   | 54.6   | 2.3             | 2.8    | 3.0    | 53.7          | 28.5   | 30.1   |
| 2004 | 2.7             | 2.2    | 3.8    | 64.7          | 48.5   | 56.1   | 2.3             | 2.4    | 3.3    | 53.5          | 27.7   | 29.0   |
| 2005 | 2.6             | 2.2    | 3.5    | 62.6          | 43.9   | 56.4   | 2.3             | 2.6    | 2.8    | 51.1          | 28.7   | 28.3   |
| 2006 | 2.8             | 1.9    | 3.7    | 63.5          | 45.5   | 53.4   | 2.4             | 2.9    | 2.9    | 51.6          | 25.9   | 28.2   |
| 2007 | 2.7             | 2.3    | 3.6    | 58.7          | 43.4   | 51.9   | 1.9             | 3.1    | 2.8    | 50.4          | 25.7   | 27.6   |
| 2008 | 2.5             | 2.0    | 4.2    | 58.3          | 46.2   | 51.9   | 2.2             | 2.7    | 3.2    | 45.7          | 22.8   | 27.6   |
| 2009 | 2.5             | 2.5    | 3.5    | 55.3          | 41.3   | 50.2   | 2.3             | 2.7    | 3.1    | 48.9          | 22.9   | 24.9   |
| 2010 | 2.6             | 2.3    | 3.8    | 50.9          | 36.7   | 47.5   | 2.0             | 2.7    | 3.1    | 45.1          | 21.3   | 24.7   |
| 2011 | 2.7             | 2.3    | 4.1    | 53.5          | 38.0   | 45.4   | 1.7             | 2.4    | 2.9    | 43.3          | 20.4   | 24.9   |
| 2012 | 2.6             | 2.1    | 3.7    | 48.8          | 33.2   | 43.4   | 1.6             | 2.5    | 3.3    | 40.6          | 19.3   | 22.7   |
| 2013 | 2.2             | 2.2    | 3.9    | 49.4          | 33.8   | 42.8   | 2.2             | 3.0    | 2.9    | 41.0          | 19.3   | 21.8   |
| 2014 | 2.3             | 2.3    | 4.0    | 46.5          | 30.5   | 41.7   | 1.8             | 2.7    | 2.9    | 39.4          | 19.0   | 23.2   |

NOTE: 9,130 cases missing anatomic subsite not included in incidence calculations.

Supplementary Figure 1. Age-specific incidence rates of colorectal cancer among Hispanics by Hispanic subgroup (Mexico, Puerto Rico, Cuba),<sup>1</sup> and 10-year age group, National Program of Cancer Registries, 2001 – 2014

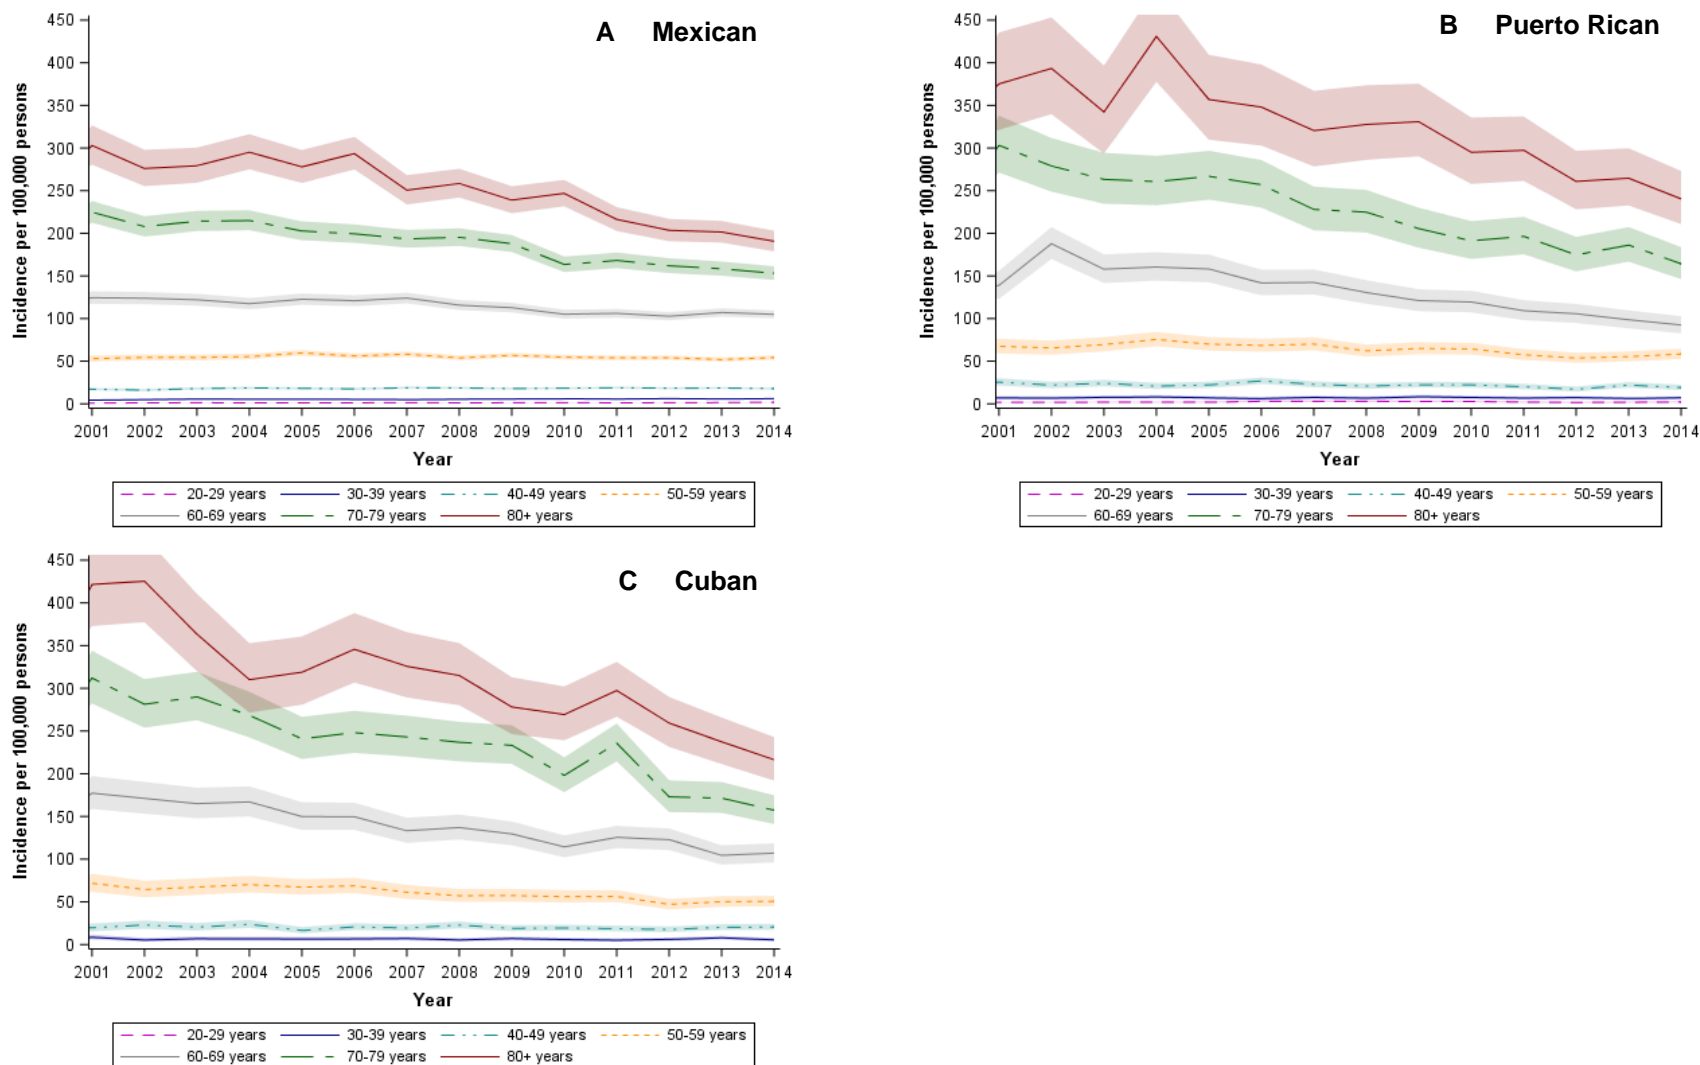

<sup>1</sup>We categorized U.S. states by majority Hispanic subgroup (Mexican, Puerto Rican, Cuban, Central American, South American, Dominican) according to the 2010 U.S. Census. Data were too sparse to estimate rates among Central American, South American, and Dominican subgroups.
